# A minimal yet flexible likelihood framework to assess correlated evolution

Abdelkader Behdenna<sup>1,2,\*</sup> Maxime Godfroid<sup>2,†</sup>  
Patrice Petot<sup>1,2</sup> Joël Pothier<sup>1</sup> Camille Nous<sup>3</sup>  
Amaury Lambert<sup>2,4</sup> Guillaume Achaz<sup>1,2,5</sup>

<sup>1</sup>Institut de Systématique, Évolution, Biodiversité (ISYEB), Muséum National d'Histoire Naturelle, CNRS UMR 7205, Sorbonne Université, École Pratique des Hautes Études, Université des Antilles, Paris, France

<sup>2</sup>SMILE group, Center for Interdisciplinary Research in Biology (CIRB), Collège de France, CNRS UMR 7241, INSERM U 1050, Paris, France

<sup>3</sup>Laboratoire Cogitamus, Paris, France

<sup>4</sup>Laboratoire de Probabilités, Statistique et Modélisation (LPSM), Sorbonne Université, CNRS UMR 8001, Université de Paris, Paris, France

<sup>5</sup>Éco-anthropologie, Muséum National d'Histoire Naturelle, CNRS UMR 7206, Université de Paris, Paris, France

\*Current affiliation: Epigene Labs, 7 square Gabriel Fauré, 75017 Paris, France

†These authors contributed equally to this work

Corresponding author: `guillaume.achaz@mnhn.fr`

**Running title:** assessing correlated evolution

## 20 Abstract

21 An evolutionary process is reflected in the sequence of changes of any trait (e.g. mor-  
 22 phological, molecular) through time . Yet, a better understanding of evolution would be  
 23 procured by characterizing correlated evolution, or when two or more evolutionary pro-  
 24 cesses interact. Many previously developed parametric methods often require significant  
 25 computing time as they rely on the estimation of many parameters. Here we propose  
 26 a minimal likelihood framework modelling the joint evolution of two traits on a known  
 27 phylogenetic tree. The type and strength of correlated evolution is characterized by  
 28 few parameters tuning mutation rates of each trait and interdependencies between these  
 29 rates. The framework can be applied to study any discrete trait or character ranging  
 30 from nucleotide substitution to gain or loss of a biological function. More specifically,  
 31 it can be used to 1) test for independence between two evolutionary processes, 2) iden-  
 32 tify the type of interaction between them and 3) estimate parameter values of the most  
 33 likely model of interaction. In its current implementation, the method takes as input  
 34 a phylogenetic tree together with mapped discrete evolutionary events on it and then  
 35 maximizes the likelihood for one or several chosen scenarios. The strengths and limits  
 36 of the method, as well as its relative power when compared to a few other methods, are  
 37 assessed using both simulations and data from 16S rRNA sequences in a sample of 54  
 38  $\gamma$ -enterobacteria. We show that even with datasets of fewer than 100 species, the method  
 39 performs well in parameter estimation and in the selection of evolutionary scenario.

40 **Keywords:** correlated evolution, maximum likelihood, model

## 41 Introduction

42 Evolutionary processes are often interdependent at all levels of organization, from molecules  
 43 (Shindyalov et al., 1994) to ecosystems (Van Valen, 1973). *Correlated evolution* is the  
 44 lack of independence in the evolution of multiple traits of the same living entity such as  
 45 an individual, a sequence or a species (Achaz and Dutheil, 2021). Here, we define *trait*  
 46 as any morphological or life history trait, or any molecular character. In many cases, one  
 47 mutation in one trait impacts the evolution of other traits. Patterns of correlated evolu-  
 48 tion naturally emerges when comparing morphological traits (e.g., size and body mass)  
 49 or when comparing molecular traits (e.g., residues of the same protein). Nevertheless,  
 50 correlated evolution might also be observed through functional constraints in metabolic

or regulation networks, without any physical interactions between the partners (Fraser et al., 2004).

The nature of biological interactions explains the different patterns of correlated evolution. For example, synergistic effects result in positive correlation whereas antagonistic ones cause negative correlations. At the molecular level, genetic interactions are named epistasis (Phillips, 2008), which refers to the influence of a genetic background on the effect of mutations. Multiple mutations may have additive or diminishing fitness effects, and all combinations are summarized in a fitness landscape. A fitness landscape is then the catalog of fitness values of all possible combinations of mutations (Wright, 1932), and its structure is highly predictive of the expected pattern of correlated evolution (Achaz and Duthiel, 2021). Fitness landscapes are an object of still important work nowadays (Achaz et al., 2014; Visser and Krug, 2014; Yi and Dean, 2019).

In this study, we restrict ourselves to the simple case of only two evolutionary processes. Compensated Pathogenic Deviations (CPDs) constitute an illuminating example of correlated evolution. CPDs are instances of the more general Bateson-Dobzhansky-Muller incompatibilities (Bateson, 1909; Dobzhansky, 1934; Muller, 1942; Orr, 1996; Welch, 2004). CPDs are highly deleterious alleles in a focal species but wild type in one or several other species. The deleterious effect of the mutated allele must then be balanced by one or more *compensatory* mutations, assuming that the effect is not simply due to environmental effects. CPDs have been reported for humans (Kondrashov et al., 2002) and insects (Kulathinal et al., 2004), and they can be as common as 10% of the deleterious amino acid substitutions. Depending on the exact nature of the epistasis between the two mutations, different mutational histories will have different likelihoods. If the first mutation to occur is the deleterious one, then the occurrence of the compensatory mutation must follow very quickly or even co-occur with the first one. When the compensatory mutation occurs first, the second one, that is no longer deleterious, can occur with some time lag. Both possible scenarios can be re-expressed in terms of induction of one event onto the other; the induction represents the intensity in which the triggering event favors the other. The inferred strength of the induction will be however different for both scenarios: for example, a strong induction in the first case and only a mild induction in the second one.

Although direct interactions cause patterns of correlated evolution, the reciprocal is not true, for at least two reasons.

First, an observed pattern of correlation can result from indirect interactions between the two focal traits. As always, correlation does not imply causation. For example, two morphological traits can jointly respond to changes of a hidden environmental variable

without having direct interaction. Similarly, two residues in proteins can show patterns of correlated evolution because they both interact with a third residue. To overcome this issue, the popular Direct Coupling Analysis (DCA) has been developed, which prevents indirect coupling and allows only pairwise interactions (Weigt et al., 2009; Morcos et al., 2011). In particular, DCA models the abundance of sequences in nature by probabilities of presence in a Potts model. In such a model, the distribution of sequence abundance depends not only on marginal frequencies at each site (local abundance) but also on joint frequencies for all pairs of sites (pairwise epistasis). The underlying assumption is that deleterious combinations of residues should be rare enough such that we do not see them in the wild. The main challenge of DCA is to infer the parameters of a highly parameterized model. Several methods have been developed to infer correctly and efficiently the model parameters but they are computationally demanding (Weigt et al., 2009; Morcos et al., 2011; Baldassi et al., 2014; Ekeberg et al., 2013). The advantage of DCA is the excellent predictive power of amino acid contacts in 3D structures (Marks et al., 2011) in comparison to simple correlation metrics such as Mutual Information (MI) (Chiu and Kolodziejczak, 1991; Martin et al., 2005). Nonetheless, MI methods are decent indicators of interactions and are so fast to compute that they can be measured for all pairs of sites on alignments of complete bacterial genomes (Bitbol, 2018; Pensar et al., 2019).

Second, patterns of apparent correlated evolution can be due to phylogenetic inertia (Harvey and Pagel, 1991). More specifically, species, sequences or individuals cannot be regarded as statistically independent samples because they partially share a history. This shared history is often represented by a phylogenetic tree. Species closer in the tree have traits that are closer in value and this extends to pairs of traits. Hence, the variable phylogenetic proximity between species create patterns of correlation for traits that are not biologically interacting. In this regard, phylogeny can be seen as a hidden variable. For continuous traits, the development of the statistically independent contrasts led to take into account phylogenetic inertia (Felsenstein, 1985). For discrete traits, an extension of the phylogenetic logistic regression for binary dependent variables was recently developed (Ives and Garland, 2010).

In this article, we are interested in quantifying correlated evolution between discrete traits. We will restrict the term *evolutionary process* to describe any process that results in *discrete evolutionary events* on a phylogenetic tree. Discrete events abstract mutations at the molecular level, but more generally can be applied to any change, gain, or loss of any biological function, of any morphological trait or of any life history trait. These events can be mapped on the phylogenetic tree using ancestral character recon-

struction (Shindyalov et al., 1994). Once the events are mapped, one can then test for the independence between the evolutionary paths of the two traits and whether both traits tend to show co-variation in the same branches of the tree (Tufféry and Darlu, 2000; Dutheil et al., 2005; Dutheil and Galtier, 2007) or whether one type of event tends to precede the other (Kryazhimskiy et al., 2011; Behdenna et al., 2016). For cases where events are placed (ignoring reconstruction uncertainties), p-values can be computed analytically for any type of correlated evolution (one event precedes the other, both events co-occur, one event prohibits the other, etc.) using matrix formalism (Behdenna et al., 2016).

The null model of independence assumes that evolutionary events follow a Poisson process, such that they occur uniformly on the tree. More generally, evolutionary processes can be modeled by time-continuous Markov processes (Felsenstein, 1981). It is then possible to generalize the model for two evolutionary processes that explicitly depend on one another (Pagel, 1994; Milligan, 1994). The model of independence corresponding to a sub-space of parameter values of the general model makes it possible to test whether the two evolutionary processes are independent (or not) using likelihood-ratio tests (LRT). Based on this idea, multiple likelihood-based approaches were proposed, although they are generally computationally demanding (Pagel, 1994; Milligan, 1994; Schöniger and von Haeseler, 1994; Tillier and Collins, 1995; Pollock et al., 1999; Baum and Donoghue, 2001; Pagel and Meade, 2006; Yeang et al., 2007; Dib et al., 2014). The methods involve exploring or maximizing over a likelihood surface that has as many dimensions as the number of parameters. For two binary traits, there are 4 possible states for the two traits (00, 01, 10, 11). When the two processes are independent, there are four transition rates (two for each trait in both directions) but there is a 4-by-4 rate matrix describing the complete process. The rate matrix is defined by 12 parameters, or 8 when double mutations are forbidden. More complex models, like 2 sites with 20 amino acids each, depend on more parameters (on the order of a few hundred). Consequently, these methods need larger datasets and expensive computation time.

Here, we propose a likelihood framework that is based on a minimal model of correlated evolution. The framework generates a series of nested models with 2 to 8 parameters that correspond to the mutation rates of each process and interactions between them. We show that these parameters are core values that characterize patterns of correlated evolution. The current implementation of the method assumes that the tree is correctly inferred and that the events are correctly placed on the tree. Using maximum likelihood, the method can (i) test for independence between two evolutionary processes, (ii) find the most likely type of correlated evolution between them (obligate or prefer-

159 ential sequential order, reciprocal synergy, incompatibility, etc.) and (iii) estimate the  
160 strength of the interaction.

## 161 Materials and Methods

### 162 Model

#### 163 A minimal model of correlated evolution

164 The following model details the joint distribution of two processes describing sequences  
165 of evolutionary events  $E_1$  and  $E_2$  respectively, on a given tree  $T$ .

166 We assume that events  $E_i$ ,  $i \in \{1, 2\}$  occur on the branches of tree  $T$  according to  
167 a Poisson process with intensity  $m_i$  hereafter called *occurrence rate*. The originality of  
168 our model is that the value of  $m_i$  can change as a function of the *realization of events*  
169  $E_i$  and  $E_j$  on the tree, as we now describe.

170 For each event  $E_i$ , its occurrence rate  $m_i$  can take 4 values  $\mu_i$ ,  $\mu_i^*$ ,  $\nu_i$  or  $\nu_i^*$ . The idea  
171 is that the trait modeled by process  $i$  can take two values, e.g. A or a for process 1 and  
172 B or b for process 2. Additionally, traits can be in a basal state or in an excited state,  
173 resulting in four states, e.g. for process 1:  $A$ ,  $A^*$ ,  $a$ ,  $a^*$ , as depicted in Figure 1a:

- 174 • The two basal rates  $\mu_i$  and  $\nu_i$  are meant to represent natural rates of occurrence  
175 of the event  $E_i$ , when trait  $i$  is in its basal state (non-starred), e.g. for process 1:  
176  $A$  mutates to  $a$  at rate  $\mu_1$  and  $a$  mutates to  $A$  at rate  $\nu_1$ .
- 177 • The starred rates  $\mu_i^*$  and  $\nu_i^*$  are meant to model excited rates of occurrence of  
178 the event  $E_i$ , when trait  $i$  is in its excited state (starred), e.g. for process 1:  $A^*$   
179 mutates to  $a$  at rate  $\mu_1^*$  and  $a^*$  mutates to  $A$  at rate  $\nu_1^*$ . Note that a trait in its  
180 excited state returns to a basal state upon mutation.
- 181 • Last, a trait  $i$  can jump from the basal state to the excited state, e.g. for process  
182 1, from  $A$  to  $A^*$  or from  $a$  to  $a^*$ . These events are induced by occurrences of the  
183 other type of event, here  $E_j$  with  $j \neq i$ .

184 Alternatively, the model can be fully specified by characterizing states with the *rates*  
185 *at which the next event will occur* and thanks to the following two rules (Figure 1):

- 186 1. When an  $E_j$  event occurs at a non-starred rate (the process  $j$  was either at  $\mu_j$   
187 or  $\nu_j$ ), the  $m_i$  rate of process  $i$  simultaneously switches to (or remains in) its

- 188 corresponding starred rate: from  $\mu_i$  (or  $\mu_i^*$ ) to  $\mu_i^*$ , and similarly, from  $\nu_i$  (or  $\nu_i^*$ )  
 189 to  $\nu_i^*$ .
- 190 2. When an  $E_i$  event occurs,  $m_i$  switches from  $\mu_i$  (or  $\mu_i^*$ ) to  $\nu_i$ , and conversely, from  
 191  $\nu_i$  (or  $\nu_i^*$ ) to  $\mu_i$ , simultaneously losing its star if any.

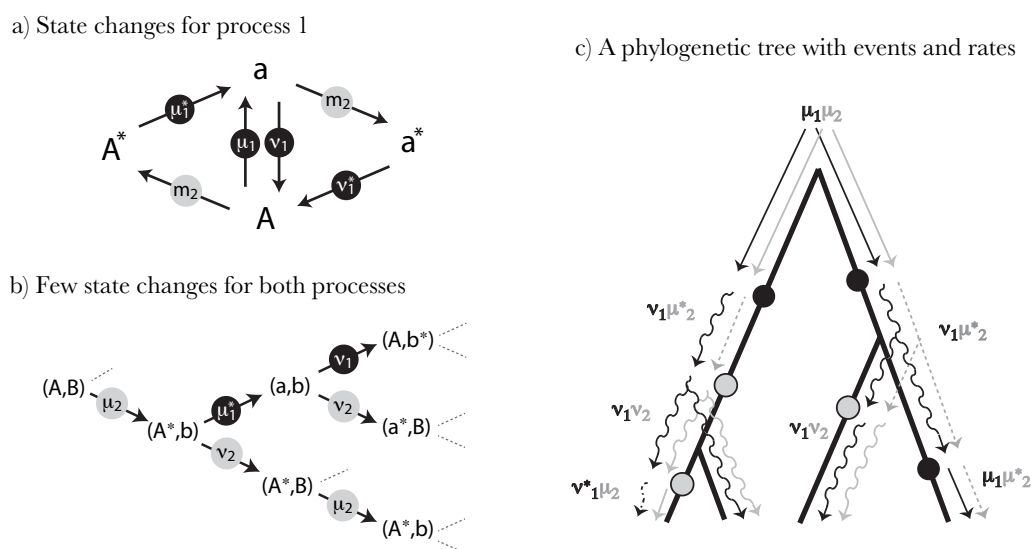

Figure 1: **A minimal model of correlated evolution between two processes.** Process 1 can be in state  $A$  or  $a$  and process 2 can be in state  $B$  or  $b$ . Black disks correspond to  $E_1$  events and grey disks correspond to  $E_2$  events. (a) State changes for process 1. Illustration showing the switches between the hidden states of process 1 and the associated occurrence rates indicated within the disks. The occurrence rates  $m_2$  can be either  $\mu_2$  or  $\nu_2$ . (b) Subset of hidden states and occurrence rate switches for the two processes. (c) Illustration showing the occurrence rate switches on a mock phylogeny. At the root, the initial rates are  $\mu_1$  and  $\mu_2$  and the hidden state is  $A, B$ .

192 The ratio  $\lambda_i = \mu_i^*/\mu_i$  (potentially also  $\lambda'_i = \nu_i^*/\nu_i$ ) can be thought of as an *induction*  
 193 factor which measures the influence of an event on another. There is no order requirement  
 194 between the rates: if  $\lambda_i > 1$ , the induction is positive (*i.e.* the intensity of the process  
 195  $i$  is increased after an event  $E_j$ ) whereas it is negative when  $\lambda_i < 1$ . We assume that  
 196 the interaction only concerns the next induced event, as it models the impact of an  $E_j$   
 197 event on the rate of occurrence of the next  $E_i$  event (and *vice-versa*). Framed in terms  
 198 of compensatory events, the second event can be seen as compensating for the need  
 199 created by the first one. In this sense, rule 2 also consumes the induction, as starred

200 rates switch back to non-starred ones. It is noteworthy to mention that, in this model,  
201 a second subsequent occurrence of  $E_j$  will not set back the rate of  $i$  to a basal one (the  
202 need remains); only an  $E_i$  event will do it. Finally, rule 2 also sets the back and forth  
203 transitions between the  $\mu$  and  $\nu$  rates.

204 This framework can be used to evaluate many relevant biological scenarios, some of  
205 which will be detailed further in the methods.

## 206 The likelihood framework

207 Let  $E_1$  and  $E_2$  be two types of events whose occurrences are distributed on a tree  $T$ , for  
208 which the topology and branch lengths are known. We compute the likelihood function  
209 as the probability of the positions of the occurrences of both events on  $T$ , under the model  
210 previously described, conditioned on a set of parameters  $(\mu_1, \mu_1^*, \nu_1, \nu_1^*, \mu_2, \mu_2^*, \nu_2, \nu_2^*)$ . As  
211 described below, we can also estimate the rates of the process at the root as well as the  
212 order of all events in the tree.

213 In our current implementation, we assume that no more than one event of each type  
214 can occur on a single branch. In the limit of small occurrence rates, this is an excellent  
215 approximation. The derivation of the likelihood for more than one event of each type  
216 on a branch becomes cumbersome otherwise. As a cautious measure, we calculate the  
217 probability that more than one event can occur on the longest branch using the highest  
218 basal mutation rate given by the ML estimates. The user is issued a warning whenever  
219 the probability is higher than 0.05.

## 220 The likelihood on a single branch

221 The likelihood of a branch  $\mathcal{B}$  of the tree depends on (i) the branch length, (ii) the  
222 occurrence rates at the beginning of the branch and (iii) which event(s) occur on the  
223 branch. Considering an initial state of rates  $(m_1, m_2)$  and the possible occurrences of  $E_1$   
224 and/or  $E_2$  on the branch, we can determine the final state of rates of the current branch,  
225 which will be used as the initial rate for the daughter branches, when they exist. All  
226 transitions are deterministic and provided in the Appendix. It is noteworthy to mention  
227 that, in the model described here, both processes can never be at the same time in a  
228 starred rate.

229 The likelihood of the branch  $\mathcal{B}$  is calculated through the following cases (formula  
230 and derivations are detailed in the Appendix): (1) no event occurred on the branch, (2)  
231 one event of type  $i$  occurred on the branch, for  $i \in [1, 2]$  and finally (3) one event of  
232 each type ( $i$  followed by  $j$  or  $j$  followed by  $i$ ) occurred on the branch. In the third case,



where  $E_1$  and  $E_2$  occurred on  $\mathcal{B}$ , we cannot assume any order between them, as both orders ( $E_1 \rightarrow E_2$ ) and ( $E_2 \rightarrow E_1$ ) are possible *a priori*; furthermore, the end rate of both processes after the branch depends on this order. We solve this issue by computing the likelihood of the branch for both possible orders (see below).

## The likelihood on the whole tree

The initial rate state at the root is either  $(\mu_1, \mu_2)$ ,  $(\mu_1^*, \mu_2)$ , or  $(\mu_1, \mu_2^*)$ . All other pairs are either impossible (e.g.  $(\mu_1^*, \mu_2^*)$ ) or are identical to a swap between  $\mu$  with  $\nu$ . Indeed,  $\mu$  and  $\nu$  can be swapped without any loss of generality (e.g.  $(\mu_1, \nu_2^*)$  is the same as  $(\mu_1, \mu_2^*)$  in the model). This remark is useful to limit the computing time, and has no consequence, since the  $\mu$  rates and the  $\nu$  rates play a completely symmetric role in our model. We calculate separately the likelihoods considering the 3 possible initial states, using the following algorithm:

- We know the initial rates of both processes on a branch (i.e., inherited from the ancestor branch or given by initialization at the root edge).
- We verify the occurrence of zero, one or both events on the branch concerned and calculate its likelihood and the rates of both processes at the end of the branch. If the branch has both types of events, we calculate separately the likelihood for the two sub-cases and propagate them in parallel with their two respective final rates.
- If the branch is not terminal, we apply this algorithm to its daughter branches, transmitting the final rate. In the case of both events in the branch, we transmit both possible final rates separately to two different paths of the recursion.

The likelihood of the whole tree is the product of the likelihoods of its branches. The number of full-tree likelihoods that must be computed scales with  $2^{b_2}$ , where  $b_2$  is the number of branches with both types of events. These two-event branches are the main limitation of the method in terms of computation time.

## Estimating the maximum likelihood

The set of eight parameters  $(\mu_1, \mu_1^*, \nu_1, \nu_1^*, \mu_2, \mu_2^*, \nu_2, \nu_2^*)$  maximizing the likelihood describes the most likely scenario leading to the observed joint distribution of the occurrences of  $E_1$  and  $E_2$  on the tree  $T$  under our model of correlated evolution. The maximum likelihood (ML) is searched by a dedicated implementation based on a mix of

(a) sequential unidimensional gradient ascent (each dimension is optimized successively),  
 (b) multidimensional gradient ascent, both using golden section search and (c) a Newton-Raphson algorithm when possible (when the curvature is negative). The implementation has been optimized for the full model but also for each nested submodels.

Each possible sequence of ordered events from the root to the leaves of the tree is evaluated and the most likely is returned. As an option, we also estimate which one of the three possible initial rates is more likely (maximizing the likelihood for each of them independently); by default we assume that it is  $(\mu_1, \mu_2)$ . As a result, the method returns the ordered events, the initial rates (optionally) and the set of parameters maximizing the likelihood.

## A selection of scenarios

Having two rate categories ( $\mu/\mu^*$  and  $\nu/\nu^*$ ) for the same process allows us to cover a wider range of scenarios. In this framework, constraining one or more parameters to a fixed value, or to be equal, can define a nested sequence of models, each being a particular case of a more general one (the most general having 8 free parameters). The likelihood can then be maximized for submodels, reducing the parameter space and shortening computation time : for example, setting  $\mu_1 = \mu_1^*$  and  $\nu_1 = \nu_1^*$  is equivalent to assuming that the occurrence rate of  $E_1$  is not influenced by the occurrences of  $E_2$ . Cases of particular interest involve submodels without correlated evolution. There are at least two such models in our framework. The most simplistic one has only two parameters:  $\mu_1$  and  $\mu_2$  (or even a single parameter  $\mu = \mu_1 = \mu_2$ ). A more flexible version of independence allows for intrinsic rate changes and is modeled by four parameters:  $\mu_1, \mu_2, \nu_1$  and  $\nu_2$ , as we detail below.

**Scenario of independence ( $H_0$ ).** In this model, each event has a single occurrence rate. Indeed, when two processes are independent, their intensities are constant regardless of the position of the occurrences of each type of event on the tree. The model therefore reduces to two parameters  $\mu_1$  and  $\mu_2$  (assuming that the  $\nu$  rates equal the  $\mu$  rates):

$$\mu_1 = \mu_1^* ; \mu_2 = \mu_2^*$$

The intensities of both processes are constant in the whole tree. When the two processes are independent but have more than one rate, a more relevant approach is to consider a model with four parameters, where starred rates are equal to non-starred ones but where  $\mu$  rates differ from  $\nu$  rates.

$$\mu_1 = \mu_1^* ; \mu_2 = \mu_2^*$$

$$\nu_1 = \nu_1^* ; \nu_2 = \nu_2^*$$

291 Interestingly, one can also test the relevance of intrinsic rate variations by compar-  
 292 ing these two models of independence. Then, one can test for correlated evolution by  
 293 measuring (and statistically testing) the likelihood improvement with extra parameters,  
 294 letting the starred rates being different from the basal ones. Some scenarios that our  
 295 model can calculate are scenarios of prohibition, asymmetric induction and reciprocal  
 296 induction.

**Scenario of prohibition.** This scenario models the case where  $E_2$  events are not allowed unless they occur after an  $E_1$  event (i.e.,  $E_1$  triggers the appearance of  $E_2$ ). This would be the case of a strongly deleterious mutation that cannot occur without being compensated upstream. If we assume a single rate ( $\mu = \nu$ ), the model contains 3 parameters

$$\mu_1 = \mu_1^* ; \mu_2 = 0 ; \mu_2^* > 0$$

297 Again, by letting  $\nu$  rates differ from  $\mu$  rates, one can also expand the model to include  
 298 two rates for each process.

299 **Scenario of asymmetric induction.**  $E_1$  events have a constant rate while the rate  
 300 of  $E_2$  is increased after an  $E_1$  event has occurred. This scenario models, for example, a  
 301 compensatory mutation that follows the fixation of a slightly deleterious mutation. More  
 302 generally, this 3-parameter model describes the process by which direct compensatory  
 303 events occur.

$$\mu_1 = \mu_1^* ; \mu_2 ; \mu_2^* = \lambda_\mu \mu_2$$

304 If one wants to include a second rate for both processes, it is possible to add two  
 305 or three parameters (e.g.  $\nu_1 = \nu_1^* ; \nu_2 ; \nu_2^* = \lambda_\nu \nu_2$ ), depending on whether one wants  
 306 to have  $\lambda_\mu = \lambda_\nu$  or not. Interestingly, unless one is specifically interested in positive  
 307 induction, there is no need to restrict  $\lambda_{(\mu,\nu)} > 1$ , as  $\lambda_{(\mu,\nu)} < 1$  would result in a scenario  
 308 where occurrences of  $E_1$  would slow down the second evolutionary process.

309 **Scenario of reciprocal induction.** Here, we consider a symmetric interaction  
 310 between both processes.  $E_1$  events enhance the occurrence rate of  $E_2$  events and, recip-  
 311 rocall,  $E_2$  events enhance the rate of occurrence of  $E_1$  events. This scenario models the

reciprocal sign epistasis, where two mutations are beneficial only in the double mutant (Weinreich et al., 2005; Poelwijk et al., 2007).

$$\mu_1 ; \mu_1^* = \lambda_1 \mu_1 ; \mu_2 ; \mu_2^* = \lambda_2 \mu_2$$

Several variants of this scenario also exist depending on whether  $\lambda_1 = \lambda_2$ , whether the  $\lambda$  are restricted to be larger or smaller than one, and finally whether the  $\mu$  rates differ from the  $\nu$  rates.

We can then compare pairs of nested models using LRTs (Neyman and Pearson, 1933). For example, when considering only two nested models, we can use the fact that twice the difference of their maximum log-likelihoods approximately follows a  $\chi^2$  distribution with degrees of freedom (df) equal to the difference in numbers of parameters:  $2 \ln(\mathcal{L}_a^{\max}/\mathcal{L}_b^{\max}) \sim \chi^2(a - b)$ . Then by comparing  $2 \ln(\mathcal{L}_a^{\max}/\mathcal{L}_b^{\max})$  to the quantiles of  $\chi^2(a - b)$ , we can decide to reject or not the model with more parameters. We have not yet come up with a generalist decision tree using a standard series LRT with a growing number of parameters. We therefore recommend to compute the ML for several scenarios and determine which parameters significantly improve the likelihood (as computation time is short enough). This exploration of the different scenarios that are embedded in the general framework (that has at most eight parameters) will provide an excellent guide to select which scenario is the most likely for the two evolutionary processes under study.

## Simulations

To assess the performance of the method, we simulated different scenarios on a perfectly symmetric phylogenetic tree with six synchronized series of bifurcations and 64 leaves. All branches have the same length.

### Estimating the occurrence rates

We first tested the accuracy of the method to retrieve occurrence rates that have been arbitrarily selected for a series of simulations. We simulated 10,000 replicates of a scenario where  $\mu_1 = 5$ ,  $\mu_2 = 4$ ,  $\mu_1^* = 20$  and  $\mu_2^* = 50$  (all  $\nu$  were equal to the  $\mu$ ). As rates are rescaled by total tree length,  $\mu_1 = 5$  implies that there are on average five occurrences of  $E_1$  when the process is at its basal rate (*i.e.*, not counting the ones that are triggered by occurrences of  $E_2$ ). We applied the ML method to each simulated replicate generating a mapping of events  $E_1$  and  $E_2$  on the tree, in order to estimate the

four rates (the  $\nu$  were equal to the  $\mu$  in these simulations). When more than one event of a kind occurred in the branch, only one was kept.

## Power to detect scenarios of induction

To assess the power of LRTs to detect an induction of  $E_1$  on  $E_2$ , we simulated two scenarios of induction.

First, we simulated a scenario of asymmetric induction of  $E_1$  on  $E_2$  with three parameters:  $\mu_1 = \mu_2 = 5$  and the induction rate  $\lambda_2$  increasing from 1 to 1000. All  $\nu$  values are equal to the corresponding  $\mu$ . We then estimate the ML values of three models: an independence model with two parameters ( $\mu_1, \mu_2; H_0$ ), the simulated model with three parameters ( $H_1$ ) and an overparametrized model with inductions in both directions ( $\mu_1, \mu_2, \mu_1^*, \mu_2^*; H_2$ ).

The second scenario is a reciprocal induction with three parameters:  $\mu_1 = \mu_2 = 5$  and  $\lambda_1 = \lambda_2$  increasing from 1 to 1000. We estimate the ML values of three models: the same independence model as above ( $H_0$ ), the simulated model with three parameters ( $H_1$ ) and an overparametrized model with inductions in both directions ( $H_2$ ).

In both simulations setup, we compute the LRT of  $H_0$  vs  $H_1$  ( $LRT_{23}$ , one degree of freedom) and  $H_2$  vs  $H_1$  ( $LRT_{24}$ , two degrees of freedom). The p-values of significance are computed assuming a  $\chi^2$  distribution of twice the logarithm of the ML ratios for their respective degrees of freedom. We compare the results of the LRT to our previous method based on counts of co-occurrences (epics-Id) and on counts of co-occurrences and subsequent occurrences (epicsS+Id) (Behdenna et al., 2016). Additionally, we added a standard analysis for the detection of correlated evolution implemented in BayesTraits Discrete (BTDiscrete) (Pagel, 1994). The last method computes the LRT between a scenario of independence with four parameters and a scenario of dependence with eight parameters. The p-value is thus calculated assuming a  $\chi^2$  distribution with four degrees of freedom. We retain all pairs that are found to reject significantly the scenario of independence with a risk of five percent.

## Power to detect induction and/or irreversible loss

We next designed three different scenarios to represent a mixture of intrinsic rate changes and interactions between the events. More specifically, we designed the following scenarios, such that in every case  $E_1$  tends to precede  $E_2$ :

1. **Induction:**  $E_1$  events favors  $E_2$  events ( $\lambda_2 > 1$ ), while  $E_2$  events slow down  $E_1$  events ( $\lambda_1 < 1$ ). This is a special case of asymmetric induction of  $E_1$  on  $E_2$ .

- 375 2. **Loss:**  $E_1$  events have a higher rate of occurrence ( $\mu_1 > \mu_2$ ) and both events can  
 376 occur only once ( $\nu_1 = \nu_2 = 0$ ). In this scenario, there is no interaction between  
 377 the two processes. Therefore, the sequential pattern ( $E_1$  precedes  $E_2$ ) is only due  
 378 to their respective intrinsic rates. A biological example would be the irreversible  
 379 loss of two functions, one being lost faster.
- 380 3. **Induction+Loss:** this scenario is a combination of irreversible loss ( $\nu_1 = \nu_2 = 0$ )  
 381 plus asymmetric induction ( $\lambda_1 < 1$ ,  $\lambda_2 > 1$ ).

382 The exact rates of the simulations are indicated in Table 1. For each scenario, we  
 383 generate 1,000 replicates and we estimate the ML values for the three models above  
 384 and a model of independence with two parameters  $\mu_1$  and  $\mu_2$  ( $H_0$ ). We then compute  
 385 the LRTs between four pairs of nested submodels (Figure 4a). LRT<sub>1</sub> and LRT<sub>4</sub> test  
 386 whether adding a single parameter  $\lambda_2 = \mu_2^*/\mu_2$  significantly improves the likelihood,  
 387 demonstrating an induction of  $E_1$  on  $E_2$ . LRT<sub>2</sub> and LRT<sub>3</sub> test whether the addition  
 388 of two parameters ( $\nu_1$  and  $\nu_2$ ) significantly improves the likelihood, demonstrating that  
 389 rate changes occur regardless of the interactions. When none of the LRTs is significant,  
 390 a scenario of no induction+no loss (referred to as  $H_0$ ) is inferred. When LRT<sub>1</sub> and LRT<sub>4</sub>  
 391 are the only two significant ones, a scenario of induction+no loss is inferred. When LRT<sub>2</sub>  
 392 and LRT<sub>3</sub> are the only two significant ones, a scenario of loss+no-induction is inferred.  
 393 When three LRTs are significant, a scenario of induction+loss is likely. Finally when all  
 394 LRTs are significant, a scenario of induction+loss is inferred.

|                | $\mu_1$   | $\mu_1^*$ | $\mu_2$ | $\mu_2^*$ | $\nu$ |
|----------------|-----------|-----------|---------|-----------|-------|
| Induction      | 10        | 5         | 10      | [5, 5000] | $\mu$ |
| Loss           | [5, 5000] | $\mu_1$   | 5       | 5         | 0     |
| Induction+Loss | 25        | 5         | 25      | [5, 5000] | 0     |

Table 1: Rates used for the simulations.

## 395 Analysis of correlated evolution between Watson-Crick pairs

396 We applied our method to detect correlated evolution between Watson-Crick pairs of  
 397 nucleotides in bacterial sequences of ribosomal ribonucleic acid sequences (rRNA). We  
 398 downloaded 55 sequences of rRNA 16S from the SILVA rRNA database (Pruesse et al.,  
 399 2007; Quast et al., 2013). Of those, 54 are sequences of gamma-enterobacteria and one

from a beta-enterobacteria, used as an outgroup. Next, we aligned the sequences with Muscle v3.6 (Edgar, 2004) and trimmed all poorly aligned positions using Gblocks v0.91b with the default parameter values (Castresana, 2000; Talavera and Castresana, 2007), resulting in 1,233 aligned nucleotides. We next inferred a phylogenetic tree using PhyML (Guindon et al., 2010) with a generalized time reversible substitution model. Finally, we inferred the ancestral states by ML with BayesTraits Multistate (Pagel et al., 2004). We assimilated any substitution on any branch of the tree as an evolutionary event, disregarding the exact nature of the substitution. The list of the 55 species, the filtered alignment and the input tree (with or without events) are provided as Supplementary Material (see also Figure S1 for the displayed phylogenetic tree).

We evaluate the performance of two tests for independence.  $LRT_{23}$  compares the ML estimate of a 2-parameter model with no induction ( $\mu_1$  and  $\mu_2$ ) to a 3-parameter model with reciprocal induction ( $\mu_1$ ,  $\mu_2$  and  $\lambda = \mu_1^*/\mu_1 = \mu_2^*/\mu_2$ ). On the other hand,  $LRT_{45}$  compares the ML estimate of a 4-parameter model of independence ( $\mu_1, \mu_2, \nu_1$  and  $\nu_2$ ) to a 5-parameter model with reciprocal induction ( $\mu_1, \mu_2, \nu_1, \nu_2$  and  $\lambda = \mu_1^*/\mu_1 = \mu_2^*/\mu_2 = \nu_1^*/\nu_1 = \nu_2^*/\nu_2$ ).

To compare our method to state-of-the-art tools to detect correlated evolution, we selected four additional methods to detect correlated evolution in the rRNA alignment: two methods based on counts of co-occurrences (epics-Id (Behdenna et al., 2016) and CoMap (Dutheil et al., 2005)), one method based on Mutual Information corrected for the phylogeny (MIp (Gloor et al., 2005)) and the ML method BTDiscrete. To compute the correlated evolution with BTDiscrete, the current available implementation allows to test only binary states. Therefore, in the alignment positions where we observed at least three states, we replaced the least represented nucleotide(s) by a gap (i.e., considered as undefined character in the program).

For each of the tools, we ranked the 75 pairs that yielded the lowest p-values. To compute the distance in Å between each pair of nucleotides, we extracted the 3D position of the nucleotides in the crystal structure of the 16S ribosome (Korostelev et al., 2006) and used the barycenter as the reference position of each nucleotide.

**Implementation** The inference program, *epocs*, has been implemented in C language and is available at <http://bioinfo.mnhn.fr/abi/public/EpoCs/>. Simulations were performed using a home made simulator written in Ocaml language, available at the same url.

## 433 Results

### 434 Simulated data

435 We first assessed the power of the method on simulated data. Simulations give an  
436 overview of the theoretical power and the limitations of the method. Through different  
437 controlled scenarios, we evaluate (a) to what extent the method correctly estimates the  
438 occurrence rates, (b) its power to reject independence and (c) its ability to find the  
439 strength and nature of the interactions between the two evolutionary processes.

### 440 Estimating the occurrence rates

441 We first tested the accuracy of the method to retrieve arbitrarily selected occurrence  
442 rates ( $\mu_1 = 5, \mu_2 = 4, \mu_1^* = 20$  and  $\mu_2^* = 50$ ) for 10,000 replicates. We observed that the  
443 distribution of all four rates shows a peak typically at the true values, demonstrating  
444 that our framework is indeed able to correctly estimate the rates (Figure 2). Notably,  
445 the basal rates are estimated with less bias ( $\bar{\mu}_1 = 4.8$  ( $sd = 2.4$ ) and  $\bar{\mu}_2 = 3.9$  ( $sd = 2.1$ ))  
446 compared to the excited rates ( $\bar{\mu}_1^* = 28.4$  ( $sd = 58.2$ ) and  $\bar{\mu}_2^* = 80.1$  ( $sd = 74.0$ )). The  
447 dispersion of estimates around the true values mostly comes from the stochasticity of  
448 the simulations. Indeed, since the events are distributed according to Poisson processes,  
449 in some cases we can get more or fewer occurrences than expected. This also explains  
450 why we observe peaks at low rates that correspond to one or two occurrences. As the  
451 current implementation does not estimate rates larger than 1000, the last bin (1000+)  
452 includes all large rates.

453 In addition, we found that the estimation of the lambda parameters approaches  
454 the expected values, where the estimation of the smaller  $\lambda_1$  is more accurate than the  
455 estimation of  $\lambda_2$  (Figure S2).

### 456 Power to detect induction

457 We further assessed the power of LRTs to detect an induction from  $E_1$  on  $E_2$  and  
458 compared them to the power of our previously published method based on counts in  
459 the phylogeny (Behdenna et al., 2016) and the ML method implemented in BayesTraits  
460 Discrete (Pagel, 1994). The power is estimated by the fraction of replicates that reject  
461 significantly the null model of independence with a p-value lower than 0.05.

462 The first simulated scenario is an asymmetric induction of  $E_1$  on  $E_2$  with three  
463 distinct parameters:  $\mu_1, \mu_2$  and  $\mu_2^*$  and an induction rate ( $\lambda = \mu_2^*/\mu_2$ ) varying from 1 (no  
464 induction) to 1000 (very strong induction); all  $\nu$  values are equal to the corresponding  $\mu$ .



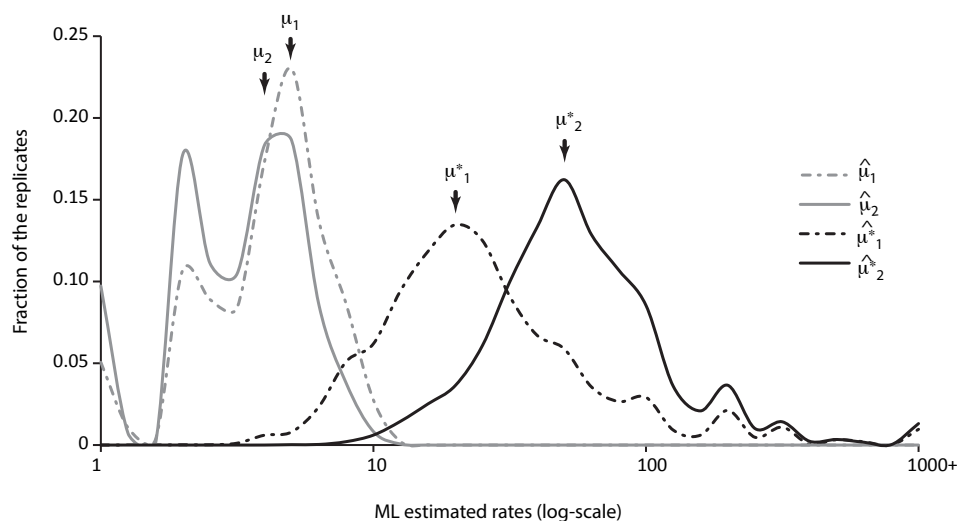

Figure 2: **Empirical distribution of 10,000 replicates of rate estimation by maximum likelihood.** For each replicate, we simulated on a perfectly symmetric tree with 64 leaves, occurrences of events with the following rates:  $\mu_1 = 5$ ,  $\mu_2 = 4$ ,  $\mu_1^* = 20$  and  $\mu_2^* = 50$ . The different peaks at low rates correspond to cases where the numbers of realized events are small (1 or 2).

The two computed LRTs, one comparing an independence model with two parameters and the simulated model, and the second comparing the independence model to an overparametrized model, outperform our previous method and the BTDiscrete module (Figure 3a). In particular, for inductions of  $\lambda > 10$ , LRTs show a very good power (above 60%) that reaches 98% for inductions  $\lambda > 100$ . Furthermore, we observed that the LRT based on the overparametrized model is slightly less powerful than the LRT based on the simulated model, suggesting that our method is capable of identifying the correct mode of correlated evolution.

The second scenario is a symmetric (reciprocal) induction between  $E_1$  and  $E_2$  with three distinct parameters:  $\mu_1$ ,  $\mu_2$  and  $\lambda = \mu_1^*/\mu_1 = \mu_2^*/\mu_2$  and  $\lambda \in [1, 1000]$ . Similarly to the one-way induction, both LRTs outperform our previous method and the BTDiscrete module (Figure 3b). In this case of reciprocal induction, the power of LRTs reaches 95% already for inductions  $\lambda > 10$ .

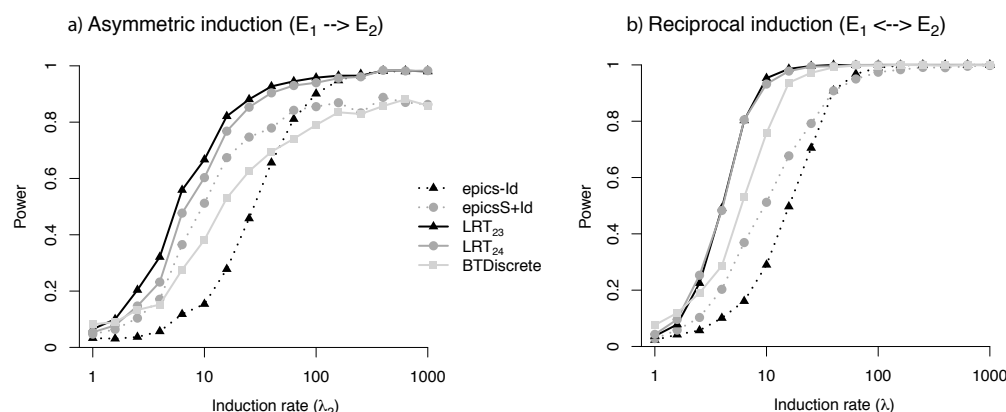

**Figure 3: Power of likelihood-ratio tests.** We compare the power of epocs to the power of our previous method, which computes exact p-values based on counts of co-occurring events (epics-Id) or co-occurring and sequentially ordered events (epicsS+Id). We also compute the result of BayesTraits Discrete (BTDiscrete). Increasing lambda values represent greater induction of  $E_1$  events on  $E_2$  events. Two LRTs are computed: LRT<sub>23</sub> correspond to the LRT between  $H_0$  (2-parameter model) to  $H_1$  (3-parameter model, identical to the parameters used in the simulations), and LRT<sub>24</sub> correspond to the LRT between  $H_0$  and  $H_2$  (overparametrized 4-parameter model). Thresholds of the LRT are computed assuming a  $\chi^2$  distribution with one or two degrees of freedom accordingly. We retained p-values that are lower than 5% (a) Power to detect correlated evolution on a simulated scenario of induction with the three parameters  $\mu_1 = 5$ ,  $\mu_2 = 5$  and  $\lambda = \mu_2^*/\mu_2$ , increasing from 1 to 1000. (b) Power to detect correlated evolution on a simulated scenario of reciprocal induction tuned by  $\lambda = \mu_1^*/\mu_1 = \mu_2^*/\mu_2$ , increasing from 1 to 1000.

## Power to detect induction and/or irreversible loss

We next assessed the power of LRTs to discriminate the effect of *interactions between the events* (modeled by the induced rates  $\mu^*$ ) and *intrinsic rate changes* (modeled by the  $\nu$  rates). More specifically, we designed three different scenarios where  $E_1$  events precede  $E_2$  events: (a) a scenario of induction, where  $E_1$  events favors  $E_2$  events, (b) a scenario of irreversible loss, where  $E_1$  events have a higher rate of occurrence and both events can occur only once, and (c) a mixed scenario of asymmetric induction and irreversible loss.

The exact rates that we used in the simulations are indicated in Table 1.

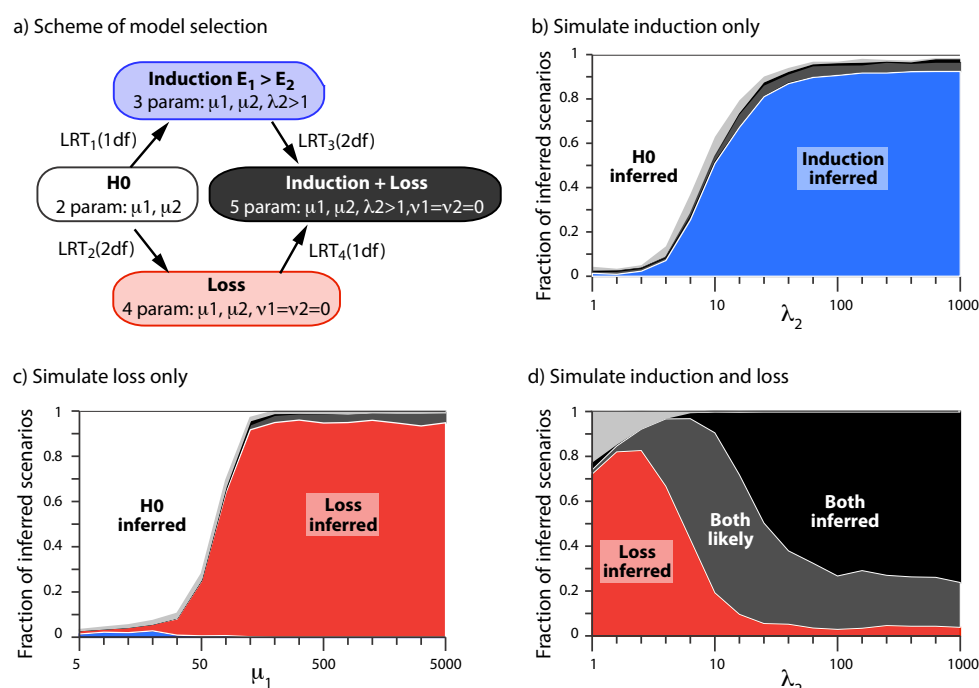

Figure 4: **Power to assess correctly whether there is an induction, a loss or both.** (a) Model selection and color code. All LRTs compare nested models with at least two rates ( $\mu_1$  and  $\mu_2$ ) and optional induction ( $\lambda_2 = \mu_2^*/\mu_2$ ) and/or loss ( $\nu_1 = \nu_2 = 0$ ). Induction is inferred (blue area) when LRT<sub>1</sub> and LRT<sub>4</sub> are the only significant tests. Loss is inferred (red area) when LRT<sub>2</sub> and LRT<sub>3</sub> are the only significant tests. Both induction and loss are likely (dark grey area) when LRT<sub>1</sub> and LRT<sub>2</sub> are significant as well as either LRT<sub>3</sub> or LRT<sub>4</sub>. Both are inferred (black areas) when all four tests are significant. White areas mark cases where no LRT is significant. All other cases are represented by light grey areas. (b-d) Results for the simulated scenarios. For each value of the x-axis, we simulated 1,000 replicates of one scenario. The y-axis indicates the fraction of each scenario that is inferred. (b) Scenario of induction of  $E_1$  on  $E_2$ , with  $\mu_1 = \mu_2 = 10$  and for increasing values of  $\lambda_2$ ; (c) Loss scenario, where  $\nu_1 = \nu_2 = 0$ , for increasing values of  $\mu_1$ ; (d) Induction+loss scenario, with  $\mu_1 = \mu_2 = 25$  and for increasing values of  $\lambda_2$ .

487 To assess the presence of induction and/or loss, we computed four LRTs to compare  
 488 four pairs of nested models (Figure 4a). In particular, we aim to demonstrate that our  
 489 method correctly identify the likely scenario underpinning the evolution of the simulated  
 490 traits: a scenario of induction, a scenario of loss, or both.

In a simulated scenario of asymmetric induction, the model of induction and no loss is correctly preferred, provided that  $\lambda_2$  is large enough (*i.e.*,  $\lambda_2 > 10$ ) (Figure 4b). In a simulated scenario of loss and no induction, the correct scenario is inferred, provided that  $\mu_1$  is large enough (Figure 4c). In other words,  $E_1$  events must occur rapidly and only once (followed by  $E_2$  events, that occur also once but later). Finally, we simulated a case with irreversible loss and induction. Evidence supporting both rate changes (intrinsic plus interaction) is higher as the induction of  $E_1$  on  $E_2$  gets larger (Figure 4d). When the induction is not very strong, the method only perceives the effect of loss.

From this set of simulations, we conclude that model selection based on LRTs can be used to assess the presence of interactions between the two types of events as well as intrinsic rate changes that are independent of any interaction.

## Analysis of rRNA 16S nucleotides

The ribosomal ribonucleic acid (rRNA) is a major component of the ribosome. The rRNA sequences are very well conserved, up until the last universal common ancestor. Hence, they have been used to show the diversity of living organisms, in particular the existence of the three kingdoms of life (Fox and Woese, 1975; Woese and Fox, 1977). The RNA 3D structure has been resolved experimentally (Doty et al., 1959; Leontis and Westhof, 2001), and its folding reveals physical interactions between nucleotides. In particular, the single-stranded structure of rRNA is in a large part determined by Watson-Crick pairs (hereafter WC pairs) that form stems. As the rRNA structure is strongly stabilized by stems of WC pairs, the mutation of one nucleotide involved in a WC pair is frequently deleterious and is typically only observed together with a second compensatory mutation on the paired nucleotide. WC pairs constitute a classical case of correlated evolution at the molecular level (Chiu and Kolodziejczak, 1991; Leontis and Westhof, 1998; Moore, 1999). Since both nucleotides of a WC pair are in strong interaction, we expect a very short time lag, if any, between the two mutations at paired bases.

## WC pairs show evidence of correlated evolution

We used rRNA WC pairs as a positive control to evaluate the performance of two tests for independence:  $LRT_{23}$  compares the ML estimate of a 2-parameter model with no induction to a 3-parameter model with reciprocal induction.  $LRT_{45}$  compares the ML estimate of a 4-parameter model with no induction to a 5-parameter model with reciprocal induction. The rationale is to verify whether including switches of intrinsic

rates improves the performance of LRTs. We also report the performance of our previous method based on counts of co-occurring events (epics-Id) and three additional methods to detect correlated evolution. The comparison between the pairs that are significantly coevolving and the documented WC pairs shows an overall good overlap between them (Table 2). The stronger the evidence of correlated evolution (*i.e.*, the smaller the p-values), the higher the enrichment of WC pairs. We observed that adding variable intrinsic rates (allowing  $\nu$  rates to differ from  $\mu$  rates) improves the specificity of LRTs (at the cost of only a marginal loss of sensitivity), so we only used the LRT<sub>45</sub> in the following and simply refer to it as LRT. The lower performance of BTDiscrete might stem from partially masking alignment positions with at least three different nucleotides (*i.e.*, only the two most frequent alleles are considered in such positions). We found 34 WC pairs in these portions, hence decreasing the inference of correlated evolution for possible pairs.

| p-value          | epics-Id |    | LRT <sub>23</sub> |    | LRT <sub>45</sub> |    | CoMap |    | Mip   |    | BTDiscrete |    |
|------------------|----------|----|-------------------|----|-------------------|----|-------|----|-------|----|------------|----|
|                  | N        | WC | N                 | WC | N                 | WC | N     | WC | N     | WC | N          | WC |
| 0.05             | 3,006    | 74 | 9,464             | 89 | 6,850             | 86 | 6,519 | 87 | 2,219 | 83 | 1,012      | 63 |
| 10 <sup>-2</sup> | 698      | 57 | 2,940             | 74 | 2,477             | 75 | 2,098 | 83 | 202   | 51 | 186        | 47 |
| 10 <sup>-3</sup> | 101      | 40 | 752               | 61 | 426               | 59 | 421   | 60 | 50    | 34 | 31         | 23 |
| 10 <sup>-4</sup> | 39       | 29 | 266               | 50 | 118               | 45 | 118   | 39 | 28    | 25 | 8          | 8  |
| 10 <sup>-5</sup> | 22       | 20 | 68                | 39 | 49                | 37 | 40    | 31 | 7     | 7  | 3          | 3  |
| 10 <sup>-6</sup> | 12       | 11 | 37                | 34 | 30                | 28 | 0     | 0  | 0     | 0  | 0          | 0  |

Table 2: Summary of the rRNA nucleotide pairs that evolve in a correlated manner for different risk values. For each method, N indicates the number of pairs with evidence of correlated evolution for the risk given in the first column; WC is the number of Watson-Crick pairs among them.

However, we note that a large fraction of the 477 WC pairs show no evidence of correlated evolution, regardless of the method. At least two reasons can be put forward: the alignment filtering procedure and the monomorphic positions in the alignment. Indeed, out of the complete set of 477 WC pairs, only 349 WC pairs (0.05% of the 759,528 unmasked possible nucleotide pairs) have both their positions unmasked after Gblocks. Furthermore, the alignment contains 422 polymorphic sites, reducing the dataset to a maximum of 106 WC pairs that could be detected among a total of 88,831 polymorphic possible nucleotide pairs. Most of the 106 WC pairs show evidence of correlated evolution for a risk of 5%, but only  $\sim 30$  very strong evidence of correlated evolution (p-value  $< 10^{-6}$ ).

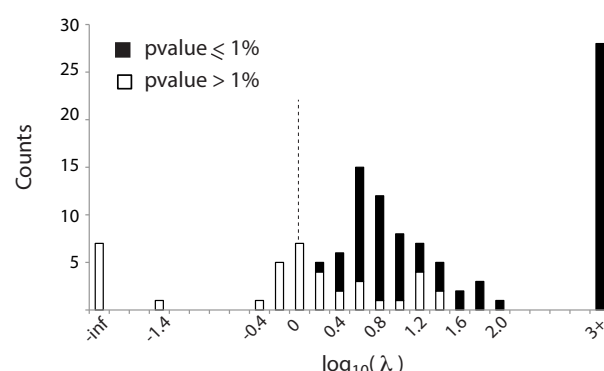

Figure 5: **Induction rates of Watson-Crick pairs in 16S rRNA sequences of 54 enterobacteria.** Assuming a model with five parameters ( $\mu_1$ ,  $\mu_2$ ,  $\nu_1$ ,  $\nu_2$  and  $\lambda = \mu_i^*/\mu_i = \nu_i^*/\nu_i$ ), we estimated the reciprocal induction rate of mutation of one site onto the other. The rates are colored in black if there is statistical support for correlated evolution (at a risk of 1%) from the comparison between the model with five parameters to the model of independence with four parameters.

547 To better understand what type of WC pairs show a significant pattern of correlated  
548 evolution, we computed the induction rate  $\lambda$  of all 106 WC pairs, regardless of the  
549 significance of the LRT (Figure 5). Remarkably, we observed that the 75 WC pairs with  
550 decent support for correlated evolution (p-value < 1%) have stronger induction rate than  
551 the others. Any WC pair with an induction rate of  $\lambda > 100$  has significant support for  
552 correlated evolution at this risk.

### 553 What other nucleotide pairs show evidence for correlated evolution?

554 We selected three additional methods to infer correlated evolution and compared the  
555 amount of WC pairs detected by each tool. For each method, we ranked the 75 best  
556 nucleotide pairs, *i.e.*, the pairs that show the strongest statistical evidence for correlated  
557 evolution (disregarding the significance of p-values). We then used the 3D positions of  
558 the nucleotides in the crystal structure of the 16S ribosome to compute the distance  
559 between each pair of nucleotides. Each pair was then tagged depending on whether it  
560 was a WC pair, a non-WC pair with both nucleotides close in space ( $< 10\text{\AA}$ ) or a distant  
561 pair. We found that the LRT method is marginally more specific at detecting WC pairs  
562 (Figure 6a). In addition, epics-Id was also able to detect significant correlated evolution  
563 among close nucleotides that are not WC pairs.

564 To further characterize the non-WC nucleotide pairs that show patterns of correlated

evolution, we mapped the nucleotide positions on the rRNA secondary structure: stems of WC pairs and associated loops. Several non-WC pairs close in space belong to the same stem and are either consecutive (positions  $k$  and  $k + 1$ , i.e., stacked nucleotides) or shifted by one when compared to WC pairs (Figure 6b). This suggests that alternative non-WC interactions also constrain the evolution of the 16S rRNA.

## Discussion

In this study, we have developed a likelihood framework based on a minimal model of correlated evolution between two evolutionary processes that generate discrete events on a given phylogenetic tree. This model depends on at most eight parameters, four for each process, that represent *interactions* between the two processes (the starred rates) and intrinsic rate switches ( $\nu \neq \mu$ ). For a given tree with mapped evolutionary events, we estimate the parameters by maximum likelihood for any (sub)model defined with (a subset of) the eight parameters. Maximizing this probability is equivalent to searching for an optimal set of parameters describing the processes that led to the observed distribution of the events on the tree. Nested models also permit the direct comparison of scenarios using likelihood ratio tests, in particular to assess the support for interaction and/or intrinsic rate switches.

Using simulated controlled scenarios, we have shown that our method is accurate for estimating the occurrence rates and has good power to assess the presence of interactions despite the use of limited data (symmetric trees with only 64 leaves). Moreover, we show that the method can assess correctly which process can lead to ordered pairs of events: differential rates with irreversible loss or interaction between the two processes. Finally, based on an analysis of nucleotide pairs in an alignment of 16S rRNA sequences sampled in 54 enterobacteria, we show that the method detects correlated evolution in many polymorphic WC pairs, especially among the ones that exhibit strong reciprocal induction. In addition, we show that several pairs that are not WC but in the same stem also show evidence of correlated evolution. The comparison of performance with a selection of four previously existing methods demonstrates that the current framework is more specific at detecting WC pairs and can additionally estimate the strength of their reciprocal induction.

As the model has a small number of parameters, the computation time of likelihood maximization is fast enough to analyze correlated evolution in a very large number of pairs. In the 16S analysis, we had to maximize 2,304,091 likelihood functions (finding all possible orders of events for all pairs). The total computation time on a 8Ghz laptop,

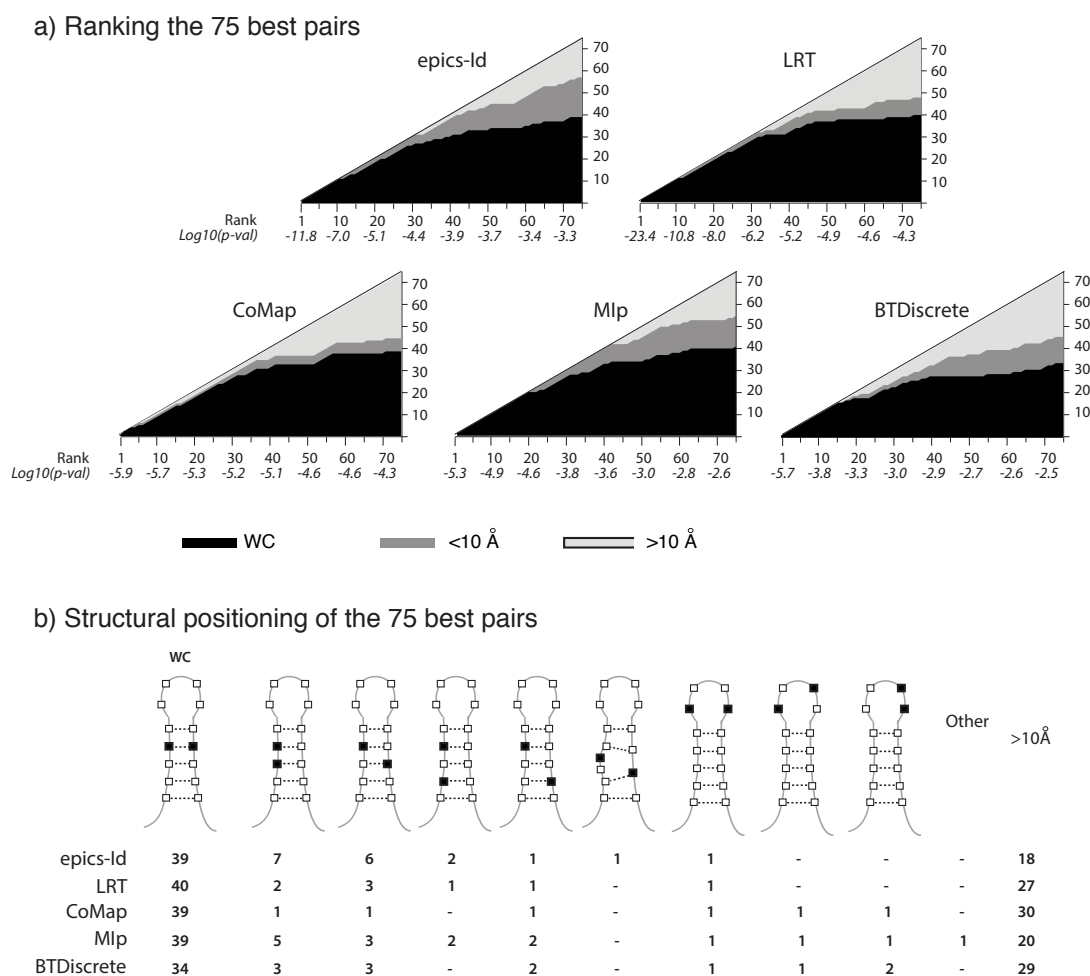

**Figure 6: Analysis of the 75 best nucleotide pairs of 16S showing correlated evolution.** (a) We report the nature of the 75 best pairs (the ones with the lowest probabilities) among all nucleotide pairs, according to five different methods: our previous method with co-occurrences (epics-Id), the LRT based method (see legend of Figure 5) using our likelihood framework, the CoMap method based on co-occurrences on the tree, the Mlp method based on Mutual Information, corrected for phylogeny, and the BTDiscrete module. Pairs are colored in black when they are Watson-Crick, on dark grey when they are closer than ten Å in the 3D structure and in light grey otherwise. Below their rank, we also report their associated p-value. (b) Relative structural positions on the stems-loops for the nucleotides of the 75 best pairs, according to the five methods.



without any parallelization, is 11 minutes for the 2-parameter model of independence ( $\mu_1$  and  $\mu_2$ ), 71 minutes for the 4-parameter model of independence, and at most 240 minutes for the full 8-parameter model (that was not used in the analysis above). This suggests that MCMC Bayesian surface exploration, that typically requires millions of likelihood estimations, could be run to analyze cases on a dataset of a reasonable size. Computation time remains, however, orders of magnitude larger than in the methods based on counts we have developed before (Behdenna et al., 2016), which takes only four seconds to compute correlated evolution from counts of co-occurrence.

The framework described here relates to the one proposed by Pagel (1994), as they both rely on likelihood computation of an explicit continuous time Markov chain. In both frameworks, the independence model is nested in a subspace of the more general model of correlated evolution, allowing to use statistical tests such as LRT to assess the statistical support for independence. However, our minimal framework differs from the one of Pagel (1994) in several important aspects. One of the major difference is that our model has at most eight parameters, whereas Pagel (1994) computes the transition rates between all possible pairs of states for the two traits. In the case of two binary traits, Pagel (1994) has eight parameters but it has hundreds for sites with 20 amino acids.

If we restrict our minimal framework to the 4-parameter model of independence (i.e., the null model of Pagel (1994)) for binary traits, and the largest 8-parameter model (i.e., the full model of Pagel (1994)), both frameworks are similar but not identical. Indeed, our model has twelve hidden states compared to four for Pagel (1994) and there is no bidirectional mapping between the transition rates.

However, our minimal model is flexible enough that one can test for likelihood improvement due to the addition of intrinsic rates changes ( $\nu \neq \mu$ ) and/or addition of interaction between the processes ( $\mu^* \neq \mu$ ). Moreover, the time to maximize the likelihood for BTDiscrete in the Watson-Crick analysis (240 minutes to compute 83,028 pairwise site comparisons) is much higher than our implementation.

More generally, our minimal model constitutes a fast and powerful tool to assess the statistical support for any scenario that is defined within the framework, ignoring extra unnecessary parameters. In addition, the comparison of the various rates of our minimal model is straightforward as they have an explicit biological interpretation (e.g., the  $\lambda$  values immediately categorizes the interaction as an induction or a repression).

A drawback of our method is that it is not designed to infer correlated evolution for processes for which occurrence rates are tuned by more than two states, e.g., when multiple amino acid transitions occur with different rates in the phylogenetic tree at the same sites. Furthermore, as the method relies on a phylogenetic tree with mapped evo-

lutionary events, it will suffer from uncertainties in phylogenetic inference and ancestral state reconstruction. Indeed, the method exploits the branch lengths to estimate the rates of the evolutionary processes on the tree. As such, trees estimated on very close sequences or on very divergent ones should be handled with care. In addition, since deep branches are particularly subject to uncertainties, one has to be careful with the tree used as input. Furthermore, our method assumes that evolutionary events are correctly placed on the tree. We therefore recommend great care in the reconstruction of the ancestral states. When possible, likelihood-based methods, such as ML (Ishikawa et al., 2019; Pupko et al., 2000) or Bayesian methods (Bouckaert et al., 2014; Pagel et al., 2004) should be preferred over parsimony. Nonetheless, we note that when there are only few events on the tree, all methods will likely perform similarly. One possible extension of our framework would be to integrate over all possible ancestral reconstructions. Altogether, we suggest that the method presented here is best suited for phylogenies that are not too deep and where the evolutionary events of interest are sparsely located.

One interesting feature of our framework is its inherent flexibility that allows the analysis of diverse types of data. Indeed, any discrete evolutionary event, regardless of its nature, that is mapped on a phylogenetic tree can be analyzed, whether it is molecular (*e.g.*, substitution) or non-molecular (*e.g.*, gain or loss of a character or of a biological function).

As a concluding remark, we would like to mention that genome-wide association studies (GWAS) can be seen as computing correlated evolution between genomic variants and a phenotypic trait of interest (Achaz and Dutheil, 2021). As any method of correlated evolution, GWAS also suffer from phylogenetic inertia due to stratification of the population into subpopulations (Price et al., 2006).

For the special case of bacteria, the TreeWAS framework was recently developed to perform GWAS-like analyses on a phylogenetic tree (Collins and Didelot, 2018). In short, the TreeWAS method performs an association analysis between genetic variants and the phenotype of interest, both conditioned on a phylogenetic tree. This suggests that our framework presented here, that can assess and quantify correlated evolution between discrete traits mapped on a phylogeny, can also be used to perform studies similar to TreeWAS.

## Acknowledgments

The authors want to thank EPC Rocha and R Kulathinal for their critical reading and helpful comments on the manuscript as well as O Tenaillon for fruitful discussions on

669 the work. This work was supported by a state grant from the *Agence Nationale de la*  
670 *Recherche* through the *Investissements d'Avenir* program ANR-16-CONV-0005. AB,  
671 MG, PP, AL and GA thank the Center for Interdisciplinary Research in Biology (CIRB,  
672 Collège de France) for funding. The authors have declared that no competing interests  
673 exist.

# References

- Achaz, G. and J. Dutheil. 2021. Correlated evolution: models and methods. arXiv:2103.11809 [q-bio.PE] .
- Achaz, G., A. Rodriguez-Verdugo, B. S. Gaut, and O. Tenaillon. 2014. The reproducibility of adaptation in the light of experimental evolution with whole genome sequencing. Adv Exp Med Biol 781:211–31.
- Baldassi, C., M. Zamparo, C. Feinauer, A. Procaccini, R. Zecchina, M. Weigt, and A. Pagnani. 2014. Fast and accurate multivariate Gaussian modeling of protein families: predicting residue contacts and protein-interaction partners. PLOS ONE 9:e92721.
- Bateson, W. 1909. Heredity and variation in modern lights. chap. III, Pages 87–110 in Danvinand Modmz Science (A. Seward, ed.) gutenberg projet <http://www.gutenberg.org/files/22430/22430-h/22430-h.htm> ed. Cambridge University Press.
- Baum, D. A. and M. J. Donoghue. 2001. A likelihood framework for the phylogenetic analysis of adaptation. Pages 24–44 in Adaptation and Optimality (S. Orzack and E. Sober, eds.). Cambridge University Press, New York.
- Behdenna, A., J. Pothier, S. S. Abby, A. Lambert, and G. Achaz. 2016. Testing for Independence between Evolutionary Processes. Syst Biol 65:812–823.
- Bitbol, A.-F. 2018. Inferring interaction partners from protein sequences using mutual information. PLOS Comput Biol 14:e1006401.
- Bouckaert, R., J. Heled, D. Kühnert, T. Vaughan, C.-H. Wu, D. Xie, M. A. Suchard, A. Rambaut, and A. J. Drummond. 2014. Beast 2: A software platform for bayesian evolutionary analysis. PLOS Comput Biol 10:1–6.
- Castresana, J. 2000. Selection of conserved blocks from multiple alignments for their use in phylogenetic analysis. Mol Biol Evol 17:540–52.
- Chiu, D. K. and T. Kolodziejczak. 1991. Inferring consensus structure from nucleic acid sequences. Comput Appl Biosci 7:347–352.

702 Collins, C. and X. Didelot. 2018. A phylogenetic method to perform genome-wide asso-  
703 ciation studies in microbes that accounts for population structure and recombination.  
704 PLOS Comput Biol 14:e1005958.

705 Dib, L., D. Silvestro, and N. Salamin. 2014. Evolutionary footprint of coevolving posi-  
706 tions in genes. Bioinformatics 30:1241–9.

707 Dobzhansky, T. 1934. Studies on hybrid sterility. Zeitschrift für Zellforschung und  
708 Mikroskopische Anatomie 21:169–223.

709 Doty, P., H. Boedtker, J. R. Fresco, R. Haselkorn, and M. Litt. 1959. Secondary structure  
710 in ribonucleic acids. Proc Natl Acad Sci U S A 45:482–99.

711 Dutheil, J. and N. Galtier. 2007. Detecting groups of coevolving positions in a molecule:  
712 a clustering approach. BMC Evol Biol 7:242.

713 Dutheil, J., T. Pupko, A. Jean-Marie, and N. Galtier. 2005. A model-based approach  
714 for detecting coevolving positions in a molecule. Mol Biol Evol 22:1919–28.

715 Edgar, R. C. 2004. Muscle: multiple sequence alignment with high accuracy and high  
716 throughput. Nucleic Acids Res 32:1792–7.

717 Ekeberg, M., C. Lövkvist, Y. Lan, M. Weigt, and E. Aurell. 2013. Improved contact  
718 prediction in proteins: using pseudolikelihoods to infer Potts models. Phys Rev E  
719 Stat Nonlin Soft Matter Phys 87:012707.

720 Felsenstein, J. 1981. Evolutionary trees from dna sequences: a maximum likelihood  
721 approach. J Mol Evol 17:368–76.

722 Felsenstein, J. 1985. Phylogenies and the comparative method. The American Naturalist  
723 125:1–15.

724 Fox, G. E. and C. R. Woese. 1975. 5s rna secondary structure. Nature 256:505–7.

725 Fraser, H. B., A. E. Hirsh, D. P. Wall, and M. B. Eisen. 2004. Coevolution of gene  
726 expression among interacting proteins. Proc Natl Acad Sci U S A 101:9033–9038.

727 Gloor, G. B., L. C. Martin, L. M. Wahl, and S. D. Dunn. 2005. Mutual information  
728 in protein multiple sequence alignments reveals two classes of coevolving positions.  
729 Biochemistry 44:7156–65.

- 730 Guindon, S., J.-F. Dufayard, V. Lefort, M. Anisimova, W. Hordijk, and O. Gascuel. 2010.  
731 New algorithms and methods to estimate maximum-likelihood phylogenies: assessing  
732 the performance of phylml 3.0. *Syst Biol* 59:307–21.
- 733 Harvey, P. H. and M. D. Pagel. 1991. *The Comparative Method In Evolutionary Biology*.  
734 Oxford University Press, U.S.A., Oxford ; New York.
- 735 Ishikawa, S. A., A. Zhukova, W. Iwasaki, and O. Gascuel. 2019. A Fast Likelihood  
736 Method to Reconstruct and Visualize Ancestral Scenarios. *Mol Biol Evol* 36:2069–  
737 2085.
- 738 Ives, A. R. and T. Garland, Jr. 2010. Phylogenetic Logistic Regression for Binary De-  
739 pendent Variables. *Syst Biol* 59:9–26.
- 740 Kondrashov, A. S., S. Sunyaev, and F. A. Kondrashov. 2002. Dobzhansky-muller incom-  
741 patibilities in protein evolution. *Proc Natl Acad Sci U S A* 99:14878–83.
- 742 Korostelev, A., S. Trakhanov, M. Laurberg, and H. F. Noller. 2006. Crystal structure of  
743 a 70s ribosome-trna complex reveals functional interactions and rearrangements. *Cell*  
744 126:1065–1077.
- 745 Kryazhimskiy, S., J. Dushoff, G. A. Bazykin, and J. B. Plotkin. 2011. Prevalence of  
746 epistasis in the evolution of influenza A surface proteins. *PLOS Genet* 7:e1001301.
- 747 Kulathinal, R. J., B. R. Bettencourt, and D. L. Hartl. 2004. Compensated deleterious  
748 mutations in insect genomes. *Science* 306:1553–4.
- 749 Leontis, N. B. and E. Westhof. 1998. A common motif organizes the structure of multi-  
750 helix loops in 16 s and 23 s ribosomal rnas. *J Mol Biol* 283:571–583.
- 751 Leontis, N. B. and E. Westhof. 2001. Geometric nomenclature and classification of rna  
752 base pairs. *RNA* 7:499–512.
- 753 Marks, D. S., L. J. Colwell, R. Sheridan, T. A. Hopf, A. Pagnani, R. Zecchina, and  
754 C. Sander. 2011. Protein 3D Structure Computed from Evolutionary Sequence Vari-  
755 ation. *PLOS ONE* 6:e28766.
- 756 Martin, L. C., G. B. Gloor, S. D. Dunn, and L. M. Wahl. 2005. Using information theory  
757 to search for co-evolving residues in proteins. *Bioinformatics* 21:4116–24.

- 758 Milligan, B. 1994. Estimating evolutionary rates for discrete characters. Pages 299–311  
759 *in* Models in phylogeny reconstruction (R. W. Scotland, D. J. Siebert, and D. M.  
760 Williams, eds.) vol. Systematics Association Special Volume Number 52. Clarendon,  
761 Oxford, UK.
- 762 Moore, P. B. 1999. Structural motifs in rna. Annu Rev Biochem 68:287–300.
- 763 Morcos, F., A. Pagnani, B. Lunt, A. Bertolino, D. S. Marks, C. Sander, R. Zecchina, J. N.  
764 Onuchic, T. Hwa, and M. Weigt. 2011. Direct-coupling analysis of residue coevolution  
765 captures native contacts across many protein families. Proc Natl Acad Sci U S A  
766 108:E1293–1301.
- 767 Muller, H. 1942. Isolating mechanisms, evolution, and temperature. Biology Symposium  
768 6:71–125.
- 769 Neyman, J. and E. Pearson. 1933. On the problems of the most efficient tests of statistical  
770 hypotheses. Philos Trans R Soc Pages 289–337.
- 771 Orr, H. A. 1996. Dobzhansky, bateson, and the genetics of speciation. Genetics 144:1331–  
772 5.
- 773 Pagel, M. 1994. Detecting correlated evolution on phylogenies: a general method for the  
774 comparative analysis of discrete characters. Proc R Soc B 255:37–45.
- 775 Pagel, M. and A. Meade. 2006. Bayesian analysis of correlated evolution of discrete  
776 characters by reversible-jump markov chain monte carlo. Am Nat 167:808–25.
- 777 Pagel, M., A. Meade, and D. Barker. 2004. Bayesian estimation of ancestral character  
778 states on phylogenies. Syst Biol 53:673–84.
- 779 Pensar, J., S. Puranen, B. Arnold, N. MacAlasdair, J. Kuronen, G. Tonkin-Hill, M. Pesonen,  
780 Y. Xu, A. Sipola, L. Sánchez-Busó, J. A. Lees, C. Chewapreecha, S. D. Bentley,  
781 S. R. Harris, J. Parkhill, N. J. Croucher, and J. Corander. 2019. Genome-wide epistasis  
782 and co-selection study using mutual information. Nucleic Acids Res 47:e112–e112.
- 783 Phillips, P. C. 2008. Epistasis—the essential role of gene interactions in the structure and  
784 evolution of genetic systems. Nat Rev Genet 9:855–67.
- 785 Poelwijk, F. J., D. J. Kiviet, D. M. Weinreich, and S. J. Tans. 2007. Empirical fitness  
786 landscapes reveal accessible evolutionary paths. Nature 445:383–6.

- 787 Pollock, D. D., W. R. Taylor, and N. Goldman. 1999. Coevolving protein residues:  
788 maximum likelihood identification and relationship to structure. *J Mol Biol* 287:187–  
789 98.
- 790 Price, A. L., N. J. Patterson, R. M. Plenge, M. E. Weinblatt, N. A. Shadick, and  
791 D. Reich. 2006. Principal components analysis corrects for stratification in genome-  
792 wide association studies. *Nat Genet* 38:904–909.
- 793 Pruesse, E., C. Quast, K. Knittel, B. M. Fuchs, W. Ludwig, J. Peplies, and F. O.  
794 Glöckner. 2007. Silva: a comprehensive online resource for quality checked and aligned  
795 ribosomal rna sequence data compatible with arb. *Nucleic Acids Res* 35:7188–96.
- 796 Pupko, T., I. Pe, R. Shamir, and D. Graur. 2000. A Fast Algorithm for Joint Recon-  
797 struction of Ancestral Amino Acid Sequences. *Mol Biol Evol* 17:890–896.
- 798 Quast, C., E. Pruesse, P. Yilmaz, J. Gerken, T. Schweer, P. Yarza, J. Peplies, and  
799 F. O. Glöckner. 2013. The silva ribosomal rna gene database project: improved data  
800 processing and web-based tools. *Nucleic Acids Res* 41:D590–6.
- 801 Schöniger, M. and A. von Haeseler. 1994. A stochastic model for the evolution of auto-  
802 correlated dna sequences. *Mol Phylogenet Evol* 3:240–7.
- 803 Shindyalov, I. N., N. A. Kolchanov, and C. Sander. 1994. Can three-dimensional contacts  
804 in protein structures be predicted by analysis of correlated mutations? *Protein Eng*  
805 *Des Sel* 7:349–358.
- 806 Talavera, G. and J. Castresana. 2007. Improvement of phylogenies after removing di-  
807 vergent and ambiguously aligned blocks from protein sequence alignments. *Syst Biol*  
808 56:564–77.
- 809 Tillier, E. R. M. and R. A. Collins. 1995. Neighbor joining and maximum likelihood with  
810 rna sequences: Addressing the interdependence of sites. *Mol Biol Evol* 12:7–15.
- 811 Tufféry, P. and P. Darlu. 2000. Exploring a phylogenetic approach for the detection of  
812 correlated substitutions in proteins. *Mol Biol Evol* 17:1753–1759.
- 813 Van Valen, L. 1973. A New Evolutionary Law. *Evol Theory* 1:1–30.
- 814 Visser, J. A. G. M. d. and J. Krug. 2014. Empirical fitness landscapes and the pre-  
815 dictability of evolution. *Nat Rev Genet* 15:480–490.



816 Weigt, M., R. A. White, H. Szurmant, J. A. Hoch, and T. Hwa. 2009. Identification of  
817 direct residue contacts in protein–protein interaction by message passing. *Proc Natl*  
818 *Acad Sci U S A* 106:67–72.

819 Weinreich, D. M., R. A. Watson, and L. Chao. 2005. Perspective: Sign epistasis and  
820 genetic constraint on evolutionary trajectories. *Evolution* 59:1165–74.

821 Welch, J. J. 2004. Accumulating dobzhansky-muller incompatibilities: reconciling theory  
822 and data. *Evolution* 58:1145–56.

823 Woese, C. R. and G. E. Fox. 1977. Phylogenetic structure of the prokaryotic domain:  
824 the primary kingdoms. *Proc Natl Acad Sci U S A* 74:5088–90.

825 Wright, S. 1932. The roles of mutation, inbreeding, crossbreeding and selection in evo-  
826 lution. Pages 356–366 *in* *Proceedings of the Sixth International Congress on Genetics*  
827 vol. 1.

828 Yeang, C.-H., J. Darot, H. Noller, and D. Haussler. 2007. Detecting the coevolution of  
829 biosequences an example of rna interaction prediction. *Mol Biol Evol* 24:2119–31.

830 Yi, X. and A. M. Dean. 2019. Adaptive Landscapes in the Age of Synthetic Biology.  
831 *Mol Biol Evol* 36:890–907.

# Appendix

## A Initial and final states

The following tables sum up the final rate state corresponding to each initial rate state, for each possible case. Note that the states where both events have a starred occurrence rate are forbidden.

### No event on the branch

In this particular case, the final state is always the same as the initial state.

### One occurrence of $E_i$ only on the branch

| $E_1$              |                    | $E_2$              |                    |
|--------------------|--------------------|--------------------|--------------------|
| Initial state      | Final state        | Initial state      | Final state        |
| $(a_1, a_2)$       | $(b_1, b_2)$       | $(a_1, a_2)$       | $(b_1, b_2)$       |
| $(\mu_1, \mu_2)$   | $(\nu_1, \mu_2^*)$ | $(\mu_1, \mu_2)$   | $(\mu_1^*, \nu_2)$ |
| $(\mu_1, \mu_2^*)$ | $(\nu_1, \mu_2^*)$ | $(\mu_1, \mu_2^*)$ | $(\mu_1, \nu_2)$   |
| $(\mu_1, \nu_2)$   | $(\nu_1, \nu_2^*)$ | $(\mu_1, \nu_2)$   | $(\mu_1^*, \mu_2)$ |
| $(\mu_1, \nu_2^*)$ | $(\nu_1, \nu_2^*)$ | $(\mu_1, \nu_2^*)$ | $(\mu_1, \mu_2)$   |
| $(\mu_1^*, \mu_2)$ | $(\nu_1, \mu_2)$   | $(\mu_1^*, \mu_2)$ | $(\mu_1^*, \nu_2)$ |
| $(\mu_1^*, \nu_2)$ | $(\nu_1, \nu_2)$   | $(\mu_1^*, \nu_2)$ | $(\mu_1^*, \mu_2)$ |
| $(\nu_1, \mu_2)$   | $(\mu_1, \mu_2^*)$ | $(\nu_1, \mu_2)$   | $(\nu_1^*, \nu_2)$ |
| $(\nu_1, \mu_2^*)$ | $(\mu_1, \mu_2^*)$ | $(\nu_1, \mu_2^*)$ | $(\nu_1, \nu_2)$   |
| $(\nu_1, \nu_2)$   | $(\mu_1, \nu_2^*)$ | $(\nu_1, \nu_2)$   | $(\nu_1^*, \mu_2)$ |
| $(\nu_1, \nu_2^*)$ | $(\mu_1, \nu_2^*)$ | $(\nu_1, \nu_2^*)$ | $(\nu_1, \mu_2)$   |
| $(\nu_1^*, \mu_2)$ | $(\mu_1, \mu_2)$   | $(\nu_1^*, \mu_2)$ | $(\nu_1^*, \nu_2)$ |
| $(\nu_1^*, \nu_2)$ | $(\mu_1, \nu_2)$   | $(\nu_1^*, \nu_2)$ | $(\nu_1^*, \mu_2)$ |

## 841 Both events are present on the branch

| $E_1 \rightarrow E_2$  |                    |                    | $E_2 \rightarrow E_1$ |                    |                    |
|------------------------|--------------------|--------------------|-----------------------|--------------------|--------------------|
| Initial state          | Intermediate state | Final state        | Initial state         | Intermediate state | Final state        |
| $(a_1, a_2)$           | $(b_1, b_2)$       | $(c_1, c_2)$       | $(a_1, a_2)$          | $(b_1, b_2)$       | $(c_1, c_2)$       |
| $(\mu_1, \mu_2)$       | $(\nu_1, \mu_2^*)$ | $(\nu_1, \nu_2)$   | $(\mu_1, \mu_2)$      | $(\mu_1^*, \nu_2)$ | $(\nu_1, \nu_2)$   |
| $(\mu_1, \mu_2^*)$     | $(\nu_1, \mu_2^*)$ | $(\nu_1, \nu_2)$   | $(\mu_1, \mu_2^*)$    | $(\mu_1, \nu_2)$   | $(\nu_1, \nu_2^*)$ |
| $(\mu_1, \nu_2)$       | $(\nu_1, \nu_2^*)$ | $(\nu_1, \mu_2)$   | $(\mu_1, \nu_2)$      | $(\mu_1^*, \mu_2)$ | $(\nu_1, \mu_2)$   |
| $(\mu_1, \nu_2^*)$     | $(\nu_1, \nu_2^*)$ | $(\nu_1, \mu_2)$   | $(\mu_1, \nu_2^*)$    | $(\mu_1, \mu_2)$   | $(\nu_1, \mu_2^*)$ |
| 842 $(\mu_1^*, \mu_2)$ | $(\nu_1, \mu_2)$   | $(\nu_1^*, \nu_2)$ | $(\mu_1^*, \mu_2)$    | $(\mu_1^*, \nu_2)$ | $(\nu_1, \nu_2)$   |
| $(\mu_1^*, \nu_2)$     | $(\nu_1, \nu_2)$   | $(\nu_1^*, \mu_2)$ | $(\mu_1^*, \nu_2)$    | $(\mu_1, \mu_2)$   | $(\nu_1, \mu_2)$   |
| $(\nu_1, \mu_2)$       | $(\mu_1, \mu_2^*)$ | $(\mu_1, \nu_2)$   | $(\nu_1, \mu_2)$      | $(\nu_1^*, \nu_2)$ | $(\mu_1, \nu_2)$   |
| $(\nu_1, \mu_2^*)$     | $(\mu_1, \mu_2^*)$ | $(\mu_1, \nu_2)$   | $(\nu_1, \mu_2^*)$    | $(\nu_1, \nu_2)$   | $(\mu_1, \nu_2^*)$ |
| $(\nu_1, \nu_2)$       | $(\mu_1, \nu_2^*)$ | $(\mu_1, \mu_2)$   | $(\nu_1, \nu_2)$      | $(\nu_1^*, \mu_2)$ | $(\mu_1, \mu_2)$   |
| $(\nu_1, \nu_2^*)$     | $(\mu_1, \nu_2^*)$ | $(\mu_1, \mu_2)$   | $(\nu_1, \nu_2^*)$    | $(\nu_1, \mu_2)$   | $(\mu_1, \mu_2^*)$ |
| $(\nu_1^*, \mu_2)$     | $(\mu_1, \mu_2)$   | $(\mu_1^*, \nu_2)$ | $(\nu_1^*, \mu_2)$    | $(\nu_1^*, \nu_2)$ | $(\mu_1, \nu_2)$   |
| $(\nu_1^*, \nu_2)$     | $(\mu_1, \nu_2)$   | $(\mu_1^*, \mu_2)$ | $(\nu_1^*, \nu_2)$    | $(\nu_1, \mu_2)$   | $(\mu_1, \mu_2)$   |

## 843 B Likelihood function for a single branch

844 Let  $T$  be a tree, and  $\mathcal{B}$  a branch of this tree, of length  $l$ . We consider two events  $E_i$ ,  
845  $i \in \{1, 2\}$ , of respective occurrence rates  $(\mu_i, \mu_i^*, \nu_i, \nu_i^*)$ . Each event is assumed to occur  
846 at most once on  $\mathcal{B}$ .

847 We detail here the likelihood function for this single branch, the three possible cases  
848 being treated separately. Let  $f_{\mathcal{B}}$  be the likelihood for the branch  $\mathcal{B}$ , given the parameter  
849 values.

### 850 No event on the branch

851 Let  $a_1$  (resp.  $a_2$ ) be the occurrence rate for  $E_1$  (resp.  $E_2$ ) on the branch.

$$852 \quad f_{\mathcal{B}} = e^{-l(a_1 + a_2)}$$

### 853 One occurrence of $E_i$ , $i \in \{1, 2\}$ on the branch

854 In this case, we define:

- 855 •  $a_1$  (resp.  $a_2$ ) as the occurrence rate for  $E_1$  (resp.  $E_2$ ) before the occurrence of  $E_i$   
856 on the branch

- $b_1$  (resp.  $b_2$ ) as the occurrence rate for  $E_1$  (resp.  $E_2$ ) after the occurrence of  $E_i$  on the branch.

Those parameters take different values depending on the initial states on the branch, and according to the model. We easily get

$$\begin{aligned} f_{\mathcal{B}} &= \int_0^l a_i e^{-a_1 t} e^{-a_2 t} e^{-b_1(l-t)} e^{-b_2(l-t)} dt \\ &= -\frac{a_i}{a_1 + a_2 - b_1 - b_2} (e^{-l(a_1 + a_2)} - e^{-l(b_1 + b_2)}) \end{aligned}$$

When  $(a_1 + a_2 - b_1 - b_2) \rightarrow 0$ :

$$f_{\mathcal{B}} \rightarrow a_i l e^{-l(b_1 + b_2)}$$

## One occurrence of each event on the branch

In this subsection, we assume that the occurrence of  $E_i$  precedes the occurrence of  $E_j$  on branch  $\mathcal{B}$  ( $\{i, j\} \in \{1, 2\}, i \neq j$ ).

By analogy with the previous case, we define:

- $a_1$  (resp.  $a_2$ ) as the occurrence rate for  $E_1$  (resp.  $E_2$ ) before the occurrence of  $E_i$  on the branch
- $b_1$  (resp.  $b_2$ ) as the occurrence rate for  $E_1$  (resp.  $E_2$ ) after the occurrence of  $E_i$  and before the occurrence of  $E_j$  on the branch.
- $c_1$  (resp.  $c_2$ ) as the occurrence rate for  $E_1$  (resp.  $E_2$ ) after the occurrence of  $E_j$  on the branch.

Those parameters take different values depending on the initial states on the branch, and according to the model. We easily get

$$\begin{aligned} f_{\mathcal{B}} &= \int_0^l a_i e^{-a_1 t} e^{-a_2 t} \left( \int_0^{l-t} b_j e^{-b_1 x} e^{-b_2 x} e^{-c_1(l-t-x)} e^{-c_2(l-t-x)} dx \right) dt \\ &= \frac{a_i b_j}{c_1 + c_2 - b_1 - b_2} \left( \frac{e^{-l(a_1 + a_2)} - e^{-l(b_1 + b_2)}}{b_1 + b_2 - a_1 - a_2} - \frac{e^{-l(a_1 + a_2)} - e^{-l(c_1 + c_2)}}{c_1 + c_2 - a_1 - a_2} \right) \end{aligned}$$

If all three denominators tend to 0,

$$f_{\mathcal{B}} \rightarrow \frac{1}{2} a_i b_j l^2 e^{-l(b_1 + b_2)}$$

When  $c_1 + c_2 - b_1 - b_2 \rightarrow 0$ ,

$$f_{\mathcal{B}} \rightarrow \frac{a_i b_j}{b_1 + b_2 - a_1 - a_2} \left( \frac{e^{-l(a_1 + a_2)} - e^{-l(b_1 + b_2)}}{b_1 + b_2 - a_1 - a_2} - l e^{-l(b_1 + b_2)} \right)$$

When  $b_1 + b_2 - a_1 - a_2 \rightarrow 0$ ,

$$f_{\mathcal{B}} \rightarrow \frac{a_i b_j}{c_1 + c_2 - b_1 - b_2} \left( l e^{-l(b_1 + b_2)} - \frac{e^{-l(b_1 + b_2)} - e^{-l(c_1 + c_2)}}{c_1 + c_2 - b_1 - b_2} \right)$$

When  $a_1 + a_2 - c_1 - c_2 \rightarrow 0$ ,

$$f_{\mathcal{B}} \rightarrow \frac{a_i b_j}{c_1 + c_2 - b_1 - b_2} \left( \frac{e^{-l(b_1 + b_2)} - e^{-l(c_1 + c_2)}}{c_1 + c_2 - b_1 - b_2} - l e^{-l(c_1 + c_2)} \right)$$
